# Supplementary material
Source: PubMed Central journal article supplement (PMC3862182)
Supplement: NIHMS518696-supplement-11.pdf [file NIHMS518696-supplement-11.pdf]

**Table S1. Disease activity index (DAI) for assessment of DSS colitis severity.**

|                   | Score               |      |                            |        |                |
|-------------------|---------------------|------|----------------------------|--------|----------------|
|                   | 0                   | 1    | 2                          | 3      | 4              |
| Weight loss       | 0                   | 1-5% | 6-10%                      | 11-20% | >20%           |
| Stool consistency | Well formed pellets |      | Pasty, semi-formed pellets |        | Liquid stools  |
| Rectal bleeding   | Hemoccult negative  |      | Hemoccult positive         |        | Gross bleeding |

**Table S1. Disease activity index (DAI).** Development of DSS-induced inflammation was assessed daily based on the changes in the following parameters over time: weight of the animal, stool consistency and presence of rectal bleeding. Final score is sum of the assessed parameters.

## Supplemental Video Legend

**Video 1. Inflammation significantly correlates with age and TUNEL<sup>+</sup> IECs in *Atg16l1/Xbp1<sup>ΔIEC</sup>* mice.** Three-dimensional linear least square regression analysis for the correlation of enteritis histology score with cell death and age of animals by genotype. Each dot represents a single animal (grey, *Wt*; yellow, *Atg16l1<sup>ΔIEC</sup>*; blue, *Xbp1<sup>ΔIEC</sup>*; red, *Atg16l1/Xbp1<sup>ΔIEC</sup>* mice) and the plane represents the linear regression for the histological score as a function of age and TUNEL labeling for *Atg16l1/Xbp1<sup>ΔIEC</sup>* mice. Note that the severity of inflammation significantly correlates with numbers of TUNEL<sup>+</sup> IECs and age in *Atg16l1/Xbp1<sup>ΔIEC</sup>* mice ( $R^2=0.602$ ,  $p=0.016$ ) but not any other genotype (n=6/12/12/12). Regression analysis was performed using the R package *lessR* (<http://cran.r-project.org/web/packages/lessR/index.html>), last accessed May 2013.
